# Supplementary material
Source: MDPI journal article supplement (https://www.mdpi.com/2077-1312/11/2/438)
Supplement: s1 [file s1 › jmse-2201025-supplementary.pdf]

# Citizen science and expert judgement: a cost-efficient combination to monitor and assess the invasiveness of non-indigenous fish escapees

Paola Parretti<sup>1,2</sup>, João Gama Monteiro<sup>1,3</sup>, Francesca Gizzi<sup>1</sup>, Roi Martínez-Escauriaza<sup>4</sup>, Filipe Alves<sup>1,4</sup>, Sahar Chebaane<sup>1</sup>, Silvia Almeida<sup>1</sup>, Miguel Pessanha Pais<sup>5,6</sup>, Frederico Almada<sup>7</sup>, Marc Fernandez<sup>1</sup>, Natacha Nogueira<sup>4,8,9</sup>, Carlos Andrade<sup>1,4,9</sup>, João Canning-Clode<sup>1,10,\*</sup>

## SUPPLEMENTARY MATERIAL

Figures:

**Figure S1:** Reporting of fish species associated with *S. aurata*. Data expressed in percentage of total validated reports.

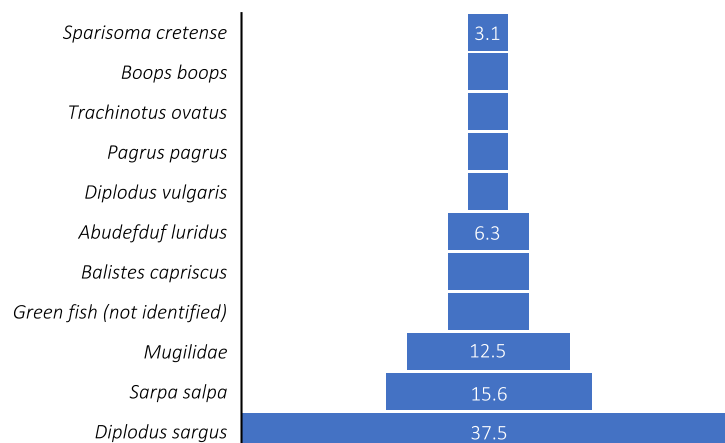

**Figure S2:** Sighting of *S. aurata* for each marine activity. (a) Sighting from SCUBA diving (b) sighting from recreational angling and, (c) sighting from spearfishing/freediving.

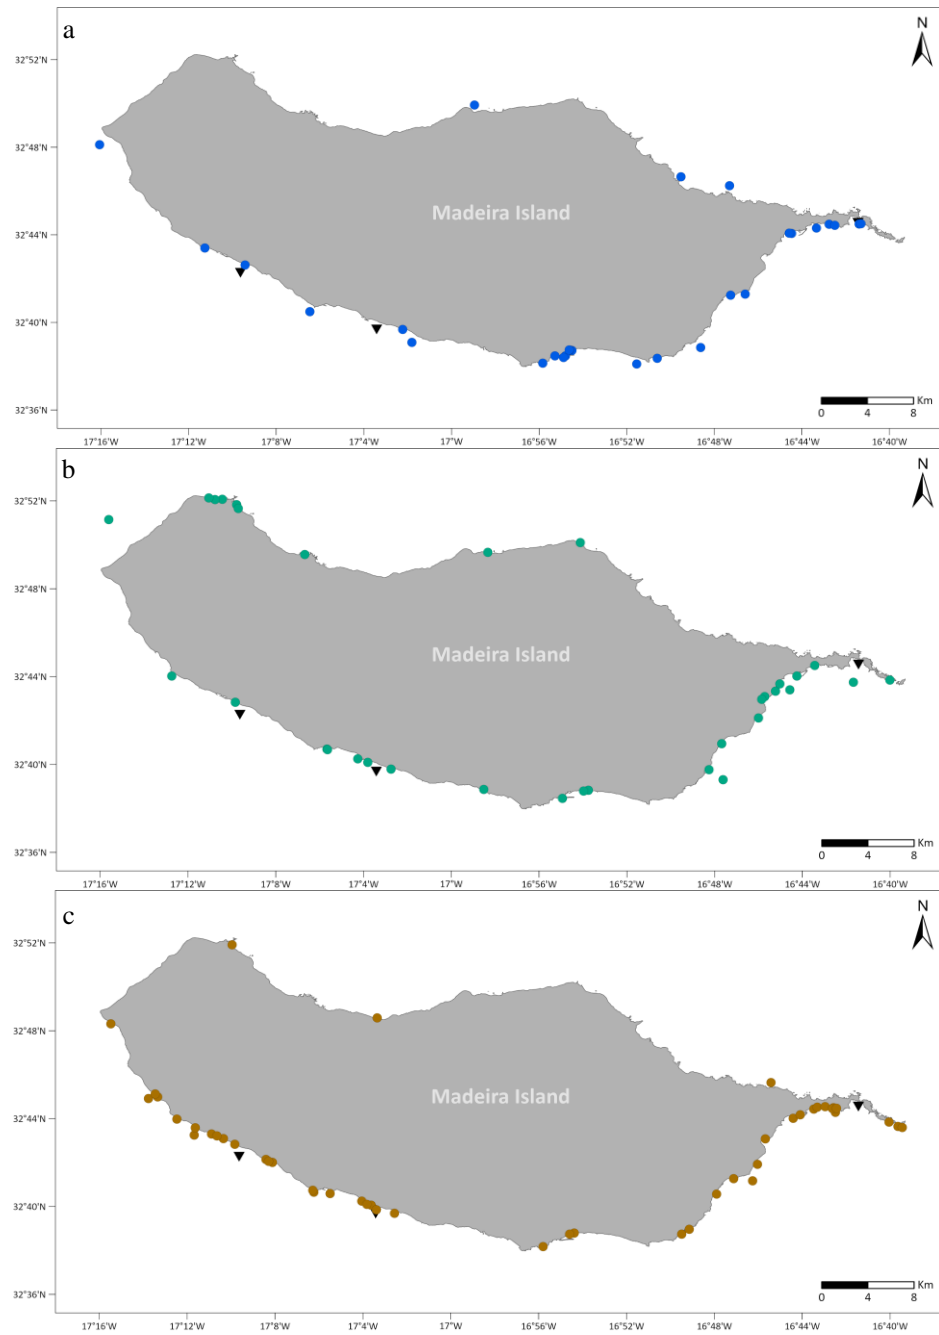

**Figure S3:** Sighting of *S. aurata* larger than 30 cm. Red represents sites where *S. aurata* larger than 30cm was always sighted while orange represents sites in which individuals larger than 30 cm were frequently seen. Black triangles are offshore aquaculture facilities.

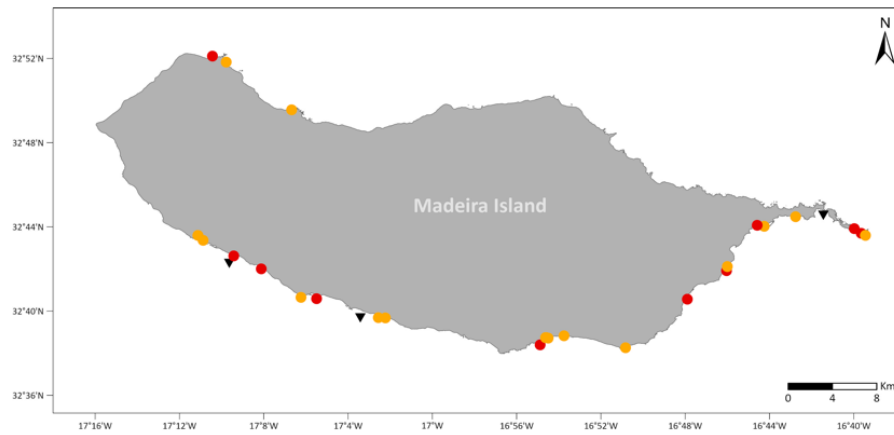

Tables:

| Frequency of sightings of <i>S. aurata</i> larger than 30 cm | Percentage of site |
|--------------------------------------------------------------|--------------------|
| Always                                                       | 9.6 %              |
| Frequently                                                   | 15.4%              |
| Occasional                                                   | 22.1%              |
| Rare                                                         | 38.5%              |
| Never                                                        | 14.4%              |

**Table S1:** Frequency of *S. aurata* individual bigger than 30 cm.

| Place            | Year | Number of contest/ number of contest with <i>S.aurada</i> caught |      |      |      |      |      |      |      |      |      |
|------------------|------|------------------------------------------------------------------|------|------|------|------|------|------|------|------|------|
|                  |      | 2010                                                             | 2011 | 2012 | 2013 | 2014 | 2015 | 2016 | 2017 | 2018 | 2019 |
| Agua de Pena     |      | 3/2                                                              | 21/2 | 16/0 | 20/0 | 16/0 | 19/0 | 20/0 | 9/0  | 6/5  | 10/1 |
| Canical-P. Natal |      | 0/0                                                              | 1/0  | 0/0  | 1/0  | 3/0  | 0/0  | 0/0  | 1/1  | 2/0  | 2/0  |
| Funchal          |      | 1/1                                                              | 2/1  | 3/0  | 1/1  | 0/0  | 0/0  | 1/0  | 0/0  | 2/1  | 2/0  |
| Lugar de baixo   |      | 0/0                                                              | 0/0  | 0/0  | 0/0  | 0/0  | 0/0  | 1/0  | 3/1  | 1/0  | 0/0  |

|                          |      |      |      |      |      |      |      |      |       |      |
|--------------------------|------|------|------|------|------|------|------|------|-------|------|
| Machico                  | 0/0  | 0/0  | 3/0  | 1/0  | 1/0  | 1/0  | 1/0  | 0/0  | 0/0   | 0/0  |
| Madalena do mar          | 0/0  | 0/0  | 0/0  | 0/0  | 0/0  | 0/0  | 3/0  | 0/0  | 0/0   | 0/0  |
| Paul do Mar              | 4/0  | 3/0  | 11/0 | 6/0  | 7/0  | 1/0  | 0/0  | 4/0  | 3/0   | 2/0  |
| Ponta Delgada            | 4/0  | 0/0  | 0/0  | 1/0  | 1/0  | 0/0  | 1/0  | 1/0  | 0/0   | 0/0  |
| Porto Moniz              | 2/0  | 2/0  | 1/0  | 3/0  | 1/0  | 2/0  | 1/0  | 1/0  | 5/6   | 3/0  |
| Porto Novo               | 0/0  | 0/0  | 2/0  | 0/0  | 0/0  | 0/0  | 0/0  | 0/0  | 0/0   | 0/0  |
| Praia Formosa            | 1/0  | 0/0  | 0/0  | 0/0  | 1/0  | 7/0  | 5/0  | 0/0  | 2/0   | 0/0  |
| São Vicente              | 0/0  | 0/0  | 0/0  | 0/0  | 0/0  | 0/0  | 0/0  | 2/0  | 0/0   | 0/0  |
| Seixal                   | 0/0  | 0/0  | 0/0  | 1/0  | 1/0  | 1/0  | 1/0  | 1/0  | 1/0   | 0/0  |
| Sta Cruz-P.<br>Palmeiras | 12/0 | 0/0  | 0/0  | 0/0  | 0/0  | 2/0  | 2/0  | 2/1  | 3/2   | 4/0  |
| Total                    | 27/3 | 29/3 | 36/0 | 34/1 | 33/0 | 31/0 | 34/0 | 28/3 | 25/14 | 23/1 |

**Table S2:** Fishing contests performed along Madeira coasts in the period between 2010-2019. Values represent the total number of contests performed/the number of contests in which *S. aurata* has been caught. Between 2010 and 2016, *S. aurata* was classified as “other species” so missing data in this period do not correspond to an absence of individuals caught.

| Place          | Average %<br><i>S. aurata</i> | n contest |
|----------------|-------------------------------|-----------|
| Canical        | 3.04                          | 1         |
| Agua de Pena   | 7.35                          | 1         |
| Santa Cruz     | 5.18                          | 1         |
| Funchal        | 0.17                          | 2         |
| Lugar de Baixo | 5.56                          | 1         |
| Porto Moniz    | 1.2                           | 6         |

**Table S3:** Fishing contests performed along Madeira coasts in the period between 2017-2019. Values represent the average percentage of *S. aurata* individual caught and the corresponding number of contests.

|                                                                                                          | Assessor 1 |           |        | Assessor 2 |           |        | Assessor 3 |           |        | Assessor 4 |           |        | Assessor 5 |           |        | Assessor 6 |           |        | Assessor 7 |           |        |
|----------------------------------------------------------------------------------------------------------|------------|-----------|--------|------------|-----------|--------|------------|-----------|--------|------------|-----------|--------|------------|-----------|--------|------------|-----------|--------|------------|-----------|--------|
|                                                                                                          | Resp       | Conf      | Scores |
| A. Biogeography/ Historical                                                                              |            |           | 1      |            |           | 3      |            |           | 8      |            |           | 21     |            |           | 15     |            |           | 13     |            |           | 17     |
| 1. Domestication/ Cultivation                                                                            |            |           | 2      |            |           | 0      |            |           | 4      |            |           | 2      |            |           | 4      |            |           | 2      |            |           | 2      |
| 1 Has the taxon been the subject of domestication (or cultivation) for at least 20 generations?          | Yes        | High      |        | Yes        | Very high |        | Yes        | Very high |        | Yes        | Very high |        | Yes        | Very high |        | Yes        | Very high |        | No         | Very High |        |
| 2 Is the taxon harvested in the wild and likely to be sold or used in its live form?                     | Yes        | High      |        | No         | Very high |        | Yes        | Very High |        |
| 3 Does the taxon have invasive races, varieties, sub-taxa or congeners?                                  | No         | Medium    |        | No         | Very high |        | Yes        | High      |        | No         | Very high |        | Yes        | Very high |        | No         | High      |        | Yes        | Very High |        |
| 2. Climate, distribution and introduction risk                                                           |            |           | 1      |            |           | 1      |            |           | 1      |            |           | 1      |            |           | 1      |            |           | 1      |            |           | 1      |
| 4 How similar are the climatic conditions of the Risk Assessment (RA) area and the taxon's native range? | Medium     | High      |        | High       | Very high |        | Medium     | High      |        | High       | High      |        | High       | High      |        | High       | Very high |        | High       | Very High |        |
| 5 What is the quality of the climate matching data?                                                      | High       | Very High |        | High       | High      |        | High       | Medium    |        | Medium     | High      |        | Medium     | Medium    |        | Medium     | Medium    |        | High       | Very High |        |
| 6 Is the taxon already present outside of captivity in the RA area?                                      | Yes        | Very high |        |
| 7 How many potential vectors could the taxon use to enter in the RA area?                                | One        | Very high |        | One        | Medium    |        | One        | Very high |        | One        | Very High |        |

|                    |                                                                                                                                                                  |     |           |     |           |     |           |      |           |     |           |     |           |     |           |
|--------------------|------------------------------------------------------------------------------------------------------------------------------------------------------------------|-----|-----------|-----|-----------|-----|-----------|------|-----------|-----|-----------|-----|-----------|-----|-----------|
| 8                  | Is the taxon currently found in close proximity to, and likely to enter into, the RA area in the near future (e.g. unintentional and intentional introductions)? | Yes | High      | Yes | Medium    | Yes | Very high | N.A. | Very high | Yes | High      | Yes | Very high | Yes | Very High |
| 3.                 | Invasive elsewhere                                                                                                                                               | -2  |           | 2   |           | 3   |           | 18   |           | 10  |           | 10  |           | 14  |           |
| 9                  | Has the taxon become naturalised (established viable populations) outside its native range?                                                                      | No  | Low       | Yes | Low       | Yes | Very high | Yes  | Very high | Yes | Very high | Yes | Medium    | No  | Medium    |
| 10                 | In the taxon's introduced range, are there known adverse impacts to wild stocks or commercial taxa?                                                              | No  | Medium    | No  | High      | Yes | Very high | Yes  | High      | Yes | Medium    | Yes | High      | Yes | Low       |
| 11                 | In the taxon's introduced range, are there known adverse impacts to aquaculture?                                                                                 | No  | Very High | No  | Very high | No  | Very high | Yes  | Very high | Yes | Medium    | No  | Very high | Yes | Medium    |
| 12                 | In the taxon's introduced range, are there known adverse impacts to ecosystem services?                                                                          | Yes | Medium    | No  | High      | No  | High      | Yes  | Very high | No  | Medium    | No  | Medium    | Yes | Medium    |
| 13                 | In the taxon's introduced range, are there known adverse socio-economic impacts?                                                                                 | No  | Medium    | No  | Very high | No  | High      | Yes  | Very high | No  | Medium    | Yes | Medium    | Yes | Medium    |
| B. Biology/Ecology |                                                                                                                                                                  | 13  |           | 16  |           | 9   |           | 8    |           | 16  |           | 10  |           | 16  |           |
| 4.                 | Undesirable (or persistence) traits                                                                                                                              | 4   |           | 6   |           | 5   |           | 5    |           | 5   |           | 1   |           | 6   |           |
| 14                 | Is it likely that the taxon will be poisonous or pose other risks to human health?                                                                               | No  | Very high | No  | Very high | No  | Very high | No   | Very high | No  | High      | No  | Very high | No  | Very High |

|    |                                                                                                                                                                         |     |           |     |           |     |           |     |           |      |        |     |        |     |        |
|----|-------------------------------------------------------------------------------------------------------------------------------------------------------------------------|-----|-----------|-----|-----------|-----|-----------|-----|-----------|------|--------|-----|--------|-----|--------|
| 15 | Is it likely that the taxon will smother one or more native taxa (that are not threatened or protected)?                                                                | Yes | Medium    | No  | High      | Yes | Low       | Yes | Medium    | N.A. | High   | Yes | Medium | No  | High   |
| 16 | Are there any threatened or protected taxa that the non-native taxon would parasitise in the RA area?                                                                   | No. | Very High | Yes | Medium    | No  | Very high | No  | Low       | No   | Medium | No  | High   | No  | High   |
| 17 | Is the taxon adaptable in terms of climatic and other environmental conditions, thus enhancing its potential persistence if it has invaded or could invade the RA area? | No  | Medium    | Yes | Medium    | Yes | High      | Yes | High      | Yes  | Medium | No  | Low    | Yes | High   |
| 18 | Is the taxon likely to disrupt food-web structure/function in aquatic ecosystems if it has invaded or is likely to invade the RA area?                                  | Yes | Medium    | No  | Medium    | No  | Low       | No  | Medium    | Yes  | Medium | No  | Low    | Yes | Medium |
| 19 | Is the taxon likely to exert adverse impacts on ecosystem services in the RA area?                                                                                      | No  | Medium    | Yes | Low       | No  | Low       | No  | Medium    | No   | Low    | No  | Medium | Yes | Low    |
| 20 | Is it likely that the taxon will host, and/or act as a vector for, recognised pests and infectious agents that are endemic in the RA area?                              | Yes | High      | Yes | Very high | No  | Low       | Yes | Very high | Yes  | Low    | No  | Low    | Yes | Medium |
| 21 | Is it likely that the taxon will host, and/or act as a vector for, recognised pests and infectious agents that are absent from (novel to) the RA area?                  | No  | Medium    | Yes | Very high | Yes | Medium    | No  | Low       | Yes  | Medium | No  | Low    | No  | Medium |

|                          |                                                                                                                                                          |     |           |     |           |     |           |     |           |      |        |     |        |     |        |
|--------------------------|----------------------------------------------------------------------------------------------------------------------------------------------------------|-----|-----------|-----|-----------|-----|-----------|-----|-----------|------|--------|-----|--------|-----|--------|
| 22                       | Is it likely that the taxon will achieve a body size that will make it more likely to be released from captivity?                                        | No  | High      | No  | Very high | No  | Very high | Yes | Very high | No   | Medium | No  | High   | Yes | High   |
| 23                       | Is the taxon capable of sustaining itself in a range of water velocity conditions (e.g. versatile in habitat use)?                                       | Yes | Very high | Yes | Very high | No  | Low       | No  | Low       | N.A. | Medium | Yes | High   | Yes | High   |
| 24                       | Is it likely that the taxon's mode of existence (e.g. excretion of by-products or behaviours (e.g. feeding) will reduce habitat quality for native taxa? | Yes | Medium    | No  | Very high | Yes | Low       | No  | Medium    | No   | Medium | No  | High   | No  | Medium |
| 25                       | Is the taxon likely to maintain a viable population even when present in low densities (or persisting in adverse conditions by way of a dormant form)?   | No  | Very High | No  | Medium    | Yes | Medium    | Yes | Medium    | Yes  | Medium | No  | Low    | No  | Medium |
| 5. Resource exploitation |                                                                                                                                                          | 2   |           | 2   |           | 2   |           | 2   |           | 2    |        | 0   |        | 0   |        |
| 26                       | Is the taxon likely to consume threatened or protected native taxa in the RA area?                                                                       | No  | Very High | No  | Very high | No  | High      | No  | Medium    | No   | Low    | No  | Low    | No  | Medium |
| 27                       | Is the taxon likely to sequester food resources (including nutrients) to the detriment of native taxa in the RA area?                                    | Yes | Low       | Yes | Medium    | Yes | High      | Yes | Medium    | Yes  | High   | No  | Low    | No  | High   |
| 6. Reproduction          |                                                                                                                                                          | 0   |           | 2   |           | 3   |           | 5   |           | 2    |        | 3   |        | 2   |        |
| 28                       | Is the taxon likely to exhibit parental care and/or to reduce age-at-maturity in response to environmental conditions?                                   | No  | Very High | Yes | Very high | No  | High      | Yes | High      | No   | Medium | No  | Medium | No  | High   |

|                         |                                                                                                                                  |     |           |     |           |      |           |     |           |     |           |     |           |     |           |
|-------------------------|----------------------------------------------------------------------------------------------------------------------------------|-----|-----------|-----|-----------|------|-----------|-----|-----------|-----|-----------|-----|-----------|-----|-----------|
| 29                      | Is the taxon likely to produce viable gametes or propagules (in the RA area)?                                                    | No  | High      | Yes | Very high | Yes  | Low       | Yes | Low       | Yes | High      | Yes | Very high | No  | Low       |
| 30                      | Is the taxon likely to hybridise naturally with native taxa?                                                                     | No  | Low       | No  | Very high | No   | Low       | No  | Medium    | No  | Low       | No  | Medium    | No  | High      |
| 31                      | Is the taxon likely to be hermaphroditic or to display asexual reproduction?                                                     | No  | Very high | No  | Very high | Yes  | High      | Yes | Very high | Yes | Very high | Yes | Medium    | Yes | Very High |
| 32                      | Is the taxon dependent on the presence of another taxon (or specific habitat features) to complete its life cycle?               | No  | Very high | No  | Medium    | No   | Very high | No  | High      | No  | High      | No  | Very high | No  | Medium    |
| 33                      | Is the taxon known (or likely) to produce a large number of propagules or offspring within a short time span (e.g. < 1 year)?    | Yes | Very High | Yes | Medium    | Yes  | Very high | Yes | Very high | No  | Medium    | Yes | High      | Yes | High      |
| 34                      | How many time units (days, months, years) does the taxon require to reach the age-at-first-reproduction?                         | 2   | High      | 2   | Very high | 2    | High      | 1   | High      | 2   | High      | 2   | Low       | 2   | High      |
| 7. Dispersal mechanisms |                                                                                                                                  | 4   |           | 1   |           | -2   |           | -1  |           | 6   |           | 3   |           | 3   |           |
| 35                      | How many potential internal vectors/pathways could the taxon use to disperse within the RA area (with suitable habitats nearby)? | One | Very high | One | Very high | None | Very high | >1  | Medium    | >1  | High      | One | Very high | One | High      |

|    |                                                                                                                                                                               |     |           |      |           |      |           |     |           |     |           |     |           |     |           |
|----|-------------------------------------------------------------------------------------------------------------------------------------------------------------------------------|-----|-----------|------|-----------|------|-----------|-----|-----------|-----|-----------|-----|-----------|-----|-----------|
| 36 | Will any of these vectors/pathways bring the taxon in close proximity to one or more protected areas (e.g. MCZ, MPA, SSSI)?                                                   | Yes | High      | Yes  | Very high | N.A. | Very high | Yes | High      |
| 37 | Does the taxon have a means of actively attaching itself to hard substrata (e.g. ship hulls, pilings, buoys) such that it enhances the likelihood of dispersal?               | No  | Very high | N.A. | Very high | No   | Very high | No  | Very high | No  | Very high | No  | Very high | No  | Very High |
| 38 | Is natural dispersal of the taxon likely to occur as eggs (for animals) or as propagules (for plants: seeds, spores) in the RA area?                                          | Yes | High      | Yes  | Very high | No   | High      | No  | High      | Yes | High      | Yes | High      | Yes | High      |
| 39 | Is natural dispersal of the taxon likely to occur as larvae/juveniles (for animals) or as fragments/seedlings (for plants) in the RA area?                                    | Yes | High      | Yes  | Low       | Yes  | Low       | No  | High      | Yes | Very high | Yes | Medium    | Yes | High      |
| 40 | Are older life stages of the taxon likely to migrate in the RA area for reproduction?                                                                                         | Yes | High      | No   | Low       | Yes  | Very high | No  | High      | Yes | Medium    | Yes | Very high | Yes | Medium    |
| 41 | Are propagules or eggs of the taxon likely to be dispersed in the RA area by other animals?                                                                                   | No  | Low       | No   | Very high | No   | High      | No  | High      | Yes | Low       | No  | High      | No  | High      |
| 42 | Is dispersal of the taxon along any of the vectors/pathways mentioned in the previous seven questions (7.01–7.07; i.e. both unintentional or intentional) likely to be rapid? | Yes | Very high | Yes  | Very high | N.A. | Very high | Yes | High      | Yes | Medium    | Yes | Very high | Yes | Very High |

|                         |                                                                                                                                                                                           |     |           |     |           |      |           |     |           |     |           |     |           |     |           |
|-------------------------|-------------------------------------------------------------------------------------------------------------------------------------------------------------------------------------------|-----|-----------|-----|-----------|------|-----------|-----|-----------|-----|-----------|-----|-----------|-----|-----------|
| 43                      | Is dispersal of the taxon density dependent?                                                                                                                                              | Yes | Medium    | No  | Medium    | No   | High      | Yes | Medium    | No  | Medium    | No  | Low       | No  | Medium    |
| 8. Tolerance attributes |                                                                                                                                                                                           | 3   |           | 5   |           | 1    |           | -3  |           | 1   |           | 3   |           | 5   |           |
| 44                      | Is the taxon able to withstand being out of water for extended periods (e.g. minimum of one or more hours) at some stage of its life cycle?                                               | No  | Very high | No  | Very high | No   | High      | No  | Very high | No  | Very high | No  | Very high | No  | Very High |
| 45                      | Is the taxon tolerant of a wide range of water quality conditions relevant to that taxon? [In the Justification field, indicate the relevant water quality variable(s) being considered.] | Yes | High      | No  | High      | Yes  | Very high | No  | High      | Yes | Medium    | Yes | Low       | Yes | High      |
| 46                      | Can the taxon be controlled or eradicated in the wild with chemical, biological, or other agents/means?                                                                                   | Yes | High      | No  | Very high | No   | High      | Yes | High      | No  | Medium    | Yes | Low       | No  | Medium    |
| 47                      | Is the taxon likely to tolerate or benefit from environmental/human disturbance?                                                                                                          | Yes | Very high | Yes | High      | N.A. | Low       | No  | Low       | No  | Low       | Yes | Medium    | Yes | Low       |
| 48                      | Is the taxon able to tolerate salinity levels that are higher or lower than those found in its usual environment?                                                                         | Yes | Very high | Yes | Very high | Yes  | Very high | Yes | Very high | Yes | High      | Yes | High      | Yes | High      |
| 49                      | Are there effective natural enemies (predators) of the taxon present in the RA area?                                                                                                      | Yes | Very high | No  | Very high | Yes  | Medium    | Yes | Very high | Yes | Medium    | Yes | Medium    | Yes | High      |

|                                                                                                                                                                 |                  |                    |                     |               |                  |                  |                  |
|-----------------------------------------------------------------------------------------------------------------------------------------------------------------|------------------|--------------------|---------------------|---------------|------------------|------------------|------------------|
| C. Climate change                                                                                                                                               | 8                | 2                  | 0                   | 6             | 8                | -2               | -10              |
| 9. Climate change                                                                                                                                               | 8                | 2                  | 0                   | 6             | 8                | -2               | -10              |
| 50 Under the predicted future climatic conditions, are the risks of entry into the RA area posed by the taxon likely to increase, decrease or not change?       | No change Medium | No change High     | No change Medium    | No change Low | Increase Medium  | No change Medium | No change Medium |
| 51 Under the predicted future climatic conditions, are the risks of establishment posed by the taxon likely to increase, decrease or not change?                | Increase Medium  | Increase High      | No change Medium    | No change Low | No change Medium | No change Medium | Decrease Medium  |
| 52 Under the predicted future climatic conditions, are the risks of dispersal within the RA area posed by the taxon likely to increase, decrease or not change? | Increase High    | Increase Very high | No change Very high | Increase Low  | Increase Medium  | No change Low    | Decrease Medium  |
| 53 Under the predicted future climatic conditions, what is the likely magnitude of future potential impacts on biodiversity and/or ecological integrity/status? | Higher Medium    | No change High     | No change Medium    | Higher Low    | Higher Low       | Lower Low        | Lower Low        |
| 54 Under the predicted future climatic conditions, what is the likely magnitude of future potential impacts on ecosystem structure and/or function?             | Higher Medium    | Lower Low          | No change Low       | Higher Low    | Higher Low       | Lower Low        | Lower Low        |
| 55 Under the predicted future climatic conditions, what is the likely magnitude of future potential impacts on ecosystem services/socio-economic factors?       | No change Medium | No change Low      | No change Medium    | No change Low | No change Low    | Higher Low       | Lower Low        |
| BRA                                                                                                                                                             | 14               | 19                 | 17                  | 29            | 31               | 23               | 33               |

|            |      |      |      |      |      |      |      |
|------------|------|------|------|------|------|------|------|
| BRA+CCA    | 22   | 21   | 17   | 35   | 39   | 21   | 23   |
| Confidence |      |      |      |      |      |      |      |
| BRA+CCA    | 0.75 | 0.8  | 0.71 | 0.7  | 0.6  | 0.62 | 0.67 |
| BRA        | 0.78 | 0.82 | 0.73 | 0.75 | 0.63 | 0.66 | 0.7  |
| CCA        | 0.5  | 0.63 | 0.54 | 0.25 | 0.38 | 0.33 | 0.38 |

**Table S4.** AS-ISK results for *S. aurata* in Madeira Archipelago. This table summarize the results of the risk assessment conducted by 7 assessors using the AS-ISK tool kit. For each assessor is shown the response (resp), the confidence (conf) and the final score. At the end of the table are presented the Basic Risk Assessment (BRA) values, which are concerned with the biogeographical and biological aspects of the targeted species and the BRA+CCA values, which address the Climate Change Assessment (CCA). For BRA and CCA are also expressed the confidence values.
